# Supplementary material for: Downregulation of ASPP2 promotes gallbladder cancer metastasis and macrophage recruitment via aPKC-ι/GLI1 pathway
Source: PubMed Central journal article supplement (PMC6214900; doi:10.1038/s41419-018-1145-1), 2018-11-02
Supplement: 41419_2018_1145_MOESM9_ESM.pdf [file 41419_2018_1145_MOESM9_ESM.pdf]

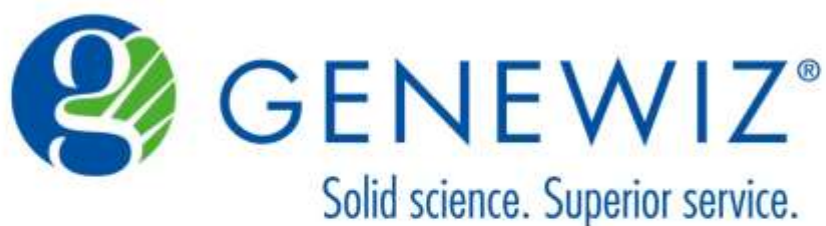

# Cell Line Authentication Report

GENEWIZ, Inc. Beijing

30 Science Park Road  
Zhong-Guan-Cun Life Science Park  
Changping District, 102206  
Beijing, China

Tel: 400-8100-669

Fax: 010-59458058

Email: [Genomics.China@genewiz.com.cn](mailto:Genomics.China@genewiz.com.cn)

[www.genewiz.com.cn](http://www.genewiz.com.cn)

## Cell Line Authentication Report

Customer: JiangLin

Institution: Xin Hua Hospital Affiliated to ShangHai Jiao Tong University School of Medicine

Quotation Number: HJ1601121

Completion Date: 02/04/2016

### 1. Sample ID: NOZ

### 2. Original Material: Cell pellets

### 3. Methods:

1). Genomic DNA was extracted from the cell pellets provided by the customer.

2). Samples, together with positive and negative control were amplified using GenePrint 10 System (Promega).

3). Amplified products were processed using the ABI3730xl Genetic Analyzer.

4). Data were analyzed using GeneMapper4.0 software and then compared with the ATCC, DSMZ or JCRB databases for reference matching.

### 4. Results:

#### 1) 10 Loci STR Profile:

| Genetic Site                                      | ATCC |    | Customer sample |    |
|---------------------------------------------------|------|----|-----------------|----|
| (Locus)                                           | NOZ  |    | NOZ             |    |
| Amelogenin                                        | X    |    | X               |    |
| CSF1PO                                            | 11   | 13 | 11              | 13 |
| D13S317                                           | 8    | 12 | 8               | 12 |
| D16S539                                           | 9    | 11 | 9               | 11 |
| D5S818                                            | 11   | 13 | 11              | 13 |
| D7S820                                            | 10   | 11 | 10              | 11 |
| THO1                                              | 7    | 9  | 7               | 9  |
| TPOX                                              | 8    | 11 | 8               | 11 |
| vWA                                               | 19   |    | 19              |    |
| D21S11                                            |      |    | 30              | 31 |
| Percent match between the sample and the database |      |    |                 |    |

profile: 100%

Summary:

- 1) Your cell line is considered to be “identical” to the reference cell line in the ATCC STR database, as the STR profile yields a 100% match.

Notes:

1.  $P=100\% \times (2 \times M)/N$ ;  $M=16$ ,  $N=32$   $P=100\% \times (2 \times 16)/32=100\%$

M: number of the matching peaks; N: number of all peaks

2. Based on the ANSI Standard, cell lines with  $\geq 80\%$  match are considered to be related; i.e., derived from a common ancestry. Cell lines with between a 55% to 80% match require further profiling for authentication of relatedness.

3. The short tandem repeat (STR) profile generated by GENEWIZ Inc. is indicative only of the sample sent to GENEWIZ Inc. at the time it was sent. This data and analysis are for research use only.

**2) Electrophoretogram**

**AB Applied Biosystems**  
GeneMapper 4.0

BJ11458

| Sample File | Sample Name | Panel             | DS                                   | SQ                                   |
|-------------|-------------|-------------------|--------------------------------------|--------------------------------------|
| NOZ_H11.fsa | NOZ         | GenePrint 10_v1.1 | <span style="color: green;">■</span> | <span style="color: green;">■</span> |

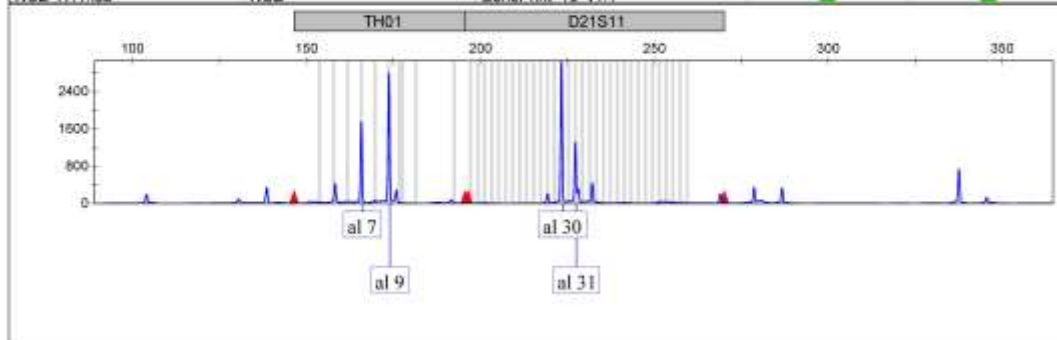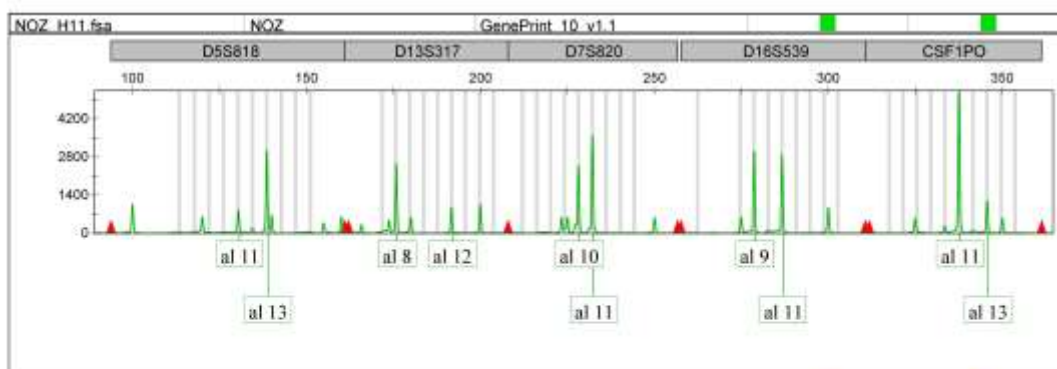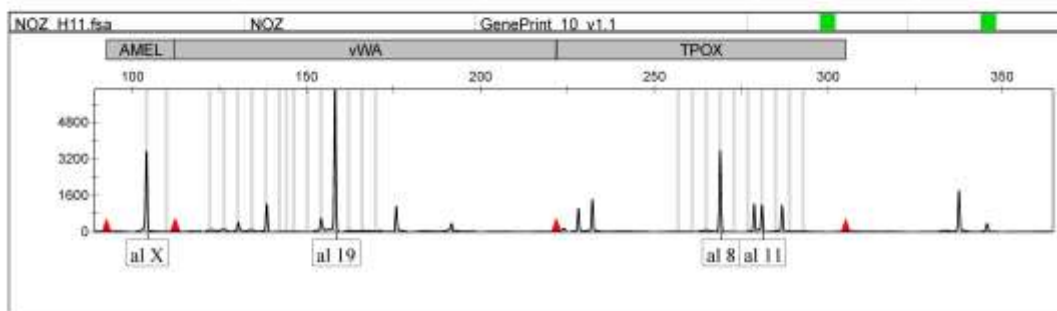

Note: Raw data in appendix

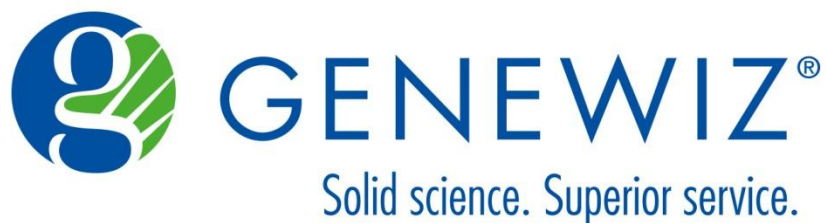

# Cell Line Authentication Report

GENEWIZ, Inc. Beijing

30 Science Park Road  
Zhong-Guan-Cun Life Science Park  
Changping District, 102206  
Beijing, China

Tel: 400-8100-669

Fax: 010-59458058

Email: [Genomics.China@genewiz.com.cn](mailto:Genomics.China@genewiz.com.cn)

[www.genewiz.com.cn](http://www.genewiz.com.cn)

## Cell Line Authentication Report

Customer: JiangLin

Institution: Xin Hua Hospital Affiliated to Shanghai Jiao Tong University School of Medicine

Quotation Number: GWBJYJ15121801

Completion Date: 12/30/2015

### 1. Sample ID: OCUG-1

### 2. Original Material: Cell pellets

### 3. Methods:

1). Genomic DNA was extracted from the cell pellets provided by the customer.

2). Samples, together with positive and negative control were amplified using GenePrint 10 System (Promega).

3). Amplified products were processed using the ABI3730xl Genetic Analyzer.

4). Data were analyzed using GeneMapper4.0 software and then compared with the ATCC, DSMZ or JCRB databases for reference matching.

### 4. Results:

#### 1) 10 Loci STR Profile:

| Genetic Site<br>(Locus)                           | JCRB   |    | Customer sample |     |
|---------------------------------------------------|--------|----|-----------------|-----|
|                                                   | OCUG-1 |    | OCUG-1          |     |
| Amelogenin                                        | X      |    | X               |     |
| CSF1PO                                            | 10     | 12 | 10              | 12  |
| D13S317                                           | 8      | 11 | 8               | 11  |
| D16S539                                           | 9      | 13 | 9               | 13  |
| D5S818                                            | 10     | 12 | 10              | 12  |
| D7S820                                            | 10     | 11 | 10              | 11  |
| TH01                                              | 7      | ?  | 7               | 9.3 |
| TPOX                                              | 8      | 11 | 8               | 11  |
| vWA                                               | ?      | 15 | 16              |     |
| D21S11                                            |        |    | 28              | 29  |
| Percent match between the sample and the database |        |    |                 |     |

profile: 88.2%

Summary:

- 1) Your cell line is considered “related” to the reference cell line in the ATCC STR database, as the STR profile yields matches that are  $\geq 80\%$  but less than 100%.

Notes:

1.  $P=100\% \times (2 \times M)/N$ ;  $M=15$ ,  $N=34$   $P=100\% \times (2 \times 15)/34=88.2\%$

M: number of the matching peaks; N: number of all peaks

2. Based on the ANSI Standard, cell lines with  $\geq 80\%$  match are considered to be related; i.e., derived from a common ancestry. Cell lines with between a 55% to 80% match require further profiling for authentication of relatedness.

3. The short tandem repeat (STR) profile generated by GENEWIZ Inc. is indicative only of the sample sent to GENEWIZ Inc. at the time it was sent. This data and analysis are for research use only.

**2) Electrophoretogram**



**AB Applied Biosystems**  
GeneMapper 4.0

BJ11387

| Sample File    | Sample Name | Panel             | OS | SQ |
|----------------|-------------|-------------------|----|----|
| OCUG-1_D12.fsa | OCUG-1      | GenePrint 10 v1.1 | ■  | ▲  |

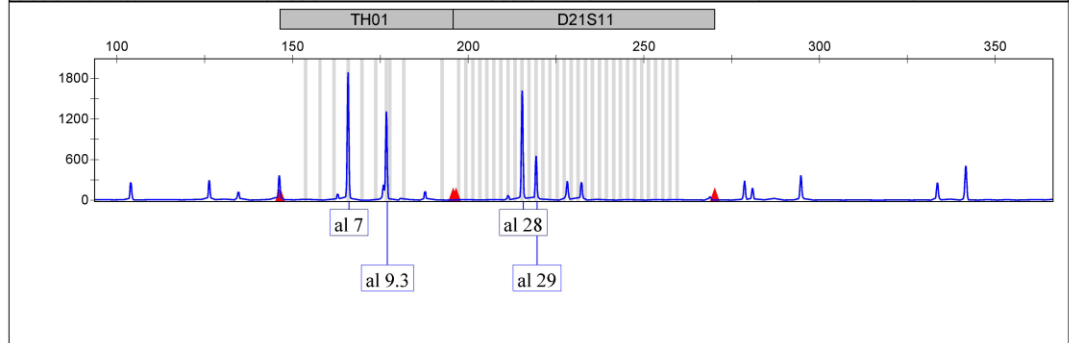

| Sample File    | Sample Name | Panel             | OS | SQ |
|----------------|-------------|-------------------|----|----|
| OCUG-1_D12.fsa | OCUG-1      | GenePrint 10 v1.1 | ■  | ▲  |

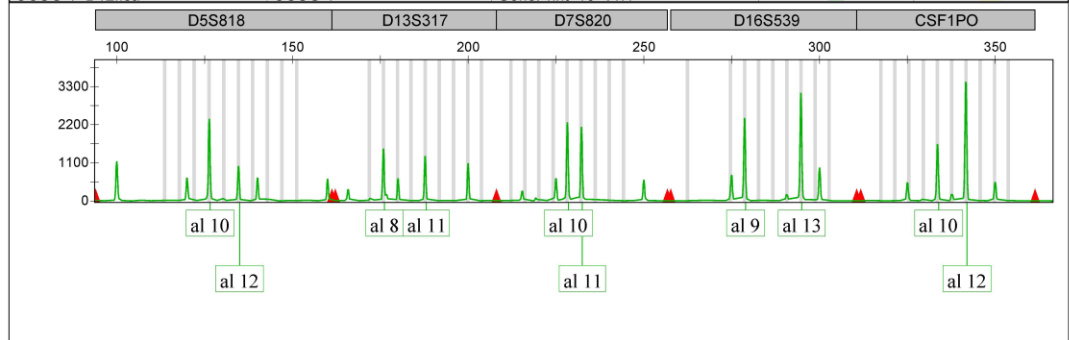

| Sample File    | Sample Name | Panel             | OS | SQ |
|----------------|-------------|-------------------|----|----|
| OCUG-1_D12.fsa | OCUG-1      | GenePrint 10 v1.1 | ■  | ▲  |

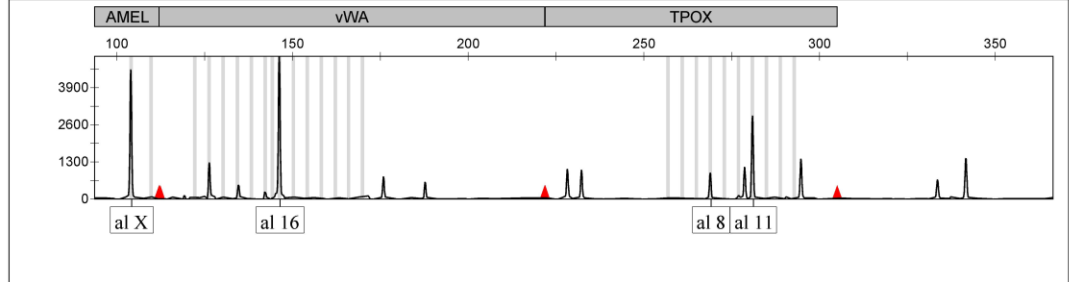

Note: Raw data in appendix
